# Supplementary material for: Gene Expression Modifications by Temperature-Toxicants Interactions in Caenorhabditis elegans
Source: PLoS One. 2011 Sep 9;6(9):e24676. doi: 10.1371/journal.pone.0024676 (PMC3170376; doi:10.1371/journal.pone.0024676)
Supplement: Table S10 — List of enriched Gene Ontology (GO) terms in regulated genes by toxicants at different temperatures in the full model analysis (from Figure 5 ). GO data were extracted from Wormbase release WB195. First column shows the GO ID number. Next six columns show the −log10 p-value for each treatment. The description of the GO term is also shown. Cells in yellow indicate significant GO terms (p-value <0.05 or −log10 p-value >1.3, hypergeometric test) (XLS) [file pone.0024676.s014.xls]

## Sheet: GO terms full model
Go term ID	CPF	DZN	Temp	CPF*Temp	DZN*Temp	CPF*DZN	CPF*DZN*Temp	Description
GO:0005524	3.5225	2.57828	6.33854	1.22132	0.898148	0.516079	2.36239	ATP binding
GO:0016887	0.88822	1.02033	1.57495	0.374854	0.214203	0.343285	0.682162	ATPase activity	LEGEND
GO:0008026	1.40692	0.526884	1.29935	0.312366	0.191233	0.0517412	1.47612	ATP-dependent helicase activity	Significant Domains terms (p-value > 1.3)
GO:0030424	1.3667	1.1279	1.25382	0.435247	2.33187	1.94415	1.03179	axon	Not significant
GO:0005488	3.14969	3.34529	3.66961	0.50931	0.563916	0.396059	3.58519	binding
GO:0010171	4.04042	1.29965	5.89058	1.21073	0.516921	0.572692	1.33123	body morphogenesis
GO:0004089	0.35147	1.02878	0.713041	1.62102	2.03875	2.43601	0.431482	carbonate dehydratase activity
GO:0004180	0.886073	0.337753	0.632748	2.18643	1.82569	0.797204	0.391849	carboxypeptidase activity
GO:0003824	2.1544	2.37623	3.75126	0.0129112	0.246782	0.0500418	2.05241	catalytic activity
GO:0051301	7.13029	2.43214	6.72408	0.474106	0.0968	0.146356	4.75411	cell division
GO:0016477	2.76713	1.90021	2.09965	0.696053	1.29423	0.655378	2.30983	cell migration
GO:0043025	0.642563	0.472444	0.623149	0.549092	1.12764	1.47116	0.385239	cell soma
GO:0006821	0.886073	0.938471	0.632748	0.378751	1.82569	2.14439	1.05932	chloride transport
GO:0040002	1.33097	0.155809	2.13769	1.09599	0.628314	0.650948	0.0563789	collagen and cuticulin-based cuticle development
GO:0004197	1.72753	1.43158	1.28483	0.490532	0.295505	0.100099	1.29383	cysteine-type endopeptidase activity
GO:0000932	3.47177	1.26184	4.21393	0.196381	0.27623	0.190416	3.86831	cytoplasmic mRNA processing body
GO:0016311	1.27197	0.258801	1.70968	0.648894	0.766032	0.596772	0.240556	dephosphorylation
GO:0003677	1.79331	0.641939	1.76947	0.0851829	0.55867	0.295004	0.825654	DNA binding
GO:0006270	6.0798	6.2655	6.9363	0.526298	0.232882	0.154081	6.68553	DNA replication initiation
GO:0009790	2.39753	1.74946	4.72491	0.0118629	0.066467	0.0487918	1.34702	embryonic development
GO:0005230	0.041785	0.0575964	0.0323679	2.40895	1.59372	1.9829	0.0125773	extracellular ligand-gated ion channel activity
GO:0050660	5.98061	4.25221	5.84138	0.29234	1.21873	0.403853	4.99422	FAD binding
GO:0001703	1.73867	1.09514	1.9424	0.169839	0.0870365	0.154139	1.40262	gastrulation with mouth forming first
GO:0042078	5.05479	2.7389	4.13944	3.11906	1.09729	0.797204	1.05932	germ-line stem cell division
GO:0008406	1.73867	0.762631	2.36979	0.0482661	0.446234	0.086119	1.86051	gonad development
GO:0040035	8.12944	2.76385	11.7461	1.16392	0.434014	2.53044	3.71186	hermaphrodite genitalia development
GO:0016021	1.05359e-05	0.00967577	1.52335e-07	1.68377	0.348057	0.633356	0.000206178	integral to membrane
GO:0008305	3.12898	3.24858	3.70834	0.526298	0.707773	0.512429	3.52015	integrin complex
GO:0005622	0.269494	0.28991	0.208846	1.1497	3.30824	2.50705	0.113039	intracellular
GO:0005216	0.41982	0.762631	0.438332	2.74395	2.69536	5.69245	0.667343	ion channel activity
GO:0004879	0.154756	1.04094	0.333491	0.405879	0.781685	2.80494	0.0724386	ligand-dependent nuclear receptor activity
GO:0005319	1.0796	0.419922	1.56464	5.66867	3.40908	5.60189	1.26123	lipid transporter activity
GO:0045132	1.55947	1.06669	1.17367	0.0463123	0.00451985	0.121011	1.07466	meiotic chromosome segregation
GO:0000212	5.74737	2.58519	3.30041	0.758925	0.96167	0.237964	4.32558	meiotic spindle organization and biogenesis
GO:0016020	0.699059	1.75091	0.999983	2.36875	1.46043	3.91424	0.97708	membrane
GO:0008152	1.48126	4.21533	4.49325	0.0541646	0.112887	0.167487	3.76824	metabolic process
GO:0046872	0.11999	0.526884	0.481471	0.462126	1.2669	1.66947	0.0848444	metal ion binding
GO:0008237	0.898176	2.131	2.08491	1.62594	0.42719	1.27716	0.752594	metallopeptidase activity
GO:0007052	2.64276	0.472444	1.16745	0.0883633	0.157969	0.70025	2.32145	mitotic spindle organization and biogenesis
GO:0004497	0.59314	2.00855	0.806214	1.4699	1.70297	1.64467	0.464663	monooxygenase activity
GO:0003730	3.75225	0.938471	7.01499	0.107553	0.169296	0.103174	3.00335	mRNA 3'-UTR binding
GO:0040015	1.88981	0.581964	1.94519	0.105464	0.0321468	0.144301	0.839075	negative regulation of multicellular organism growth
GO:0040027	1.85265	0.233871	1.8997	0.059226	0.173159	0.0506169	0.372404	negative regulation of vulval development
GO:0000184	0.394945	0.419922	0.275636	1.8657	3.40908	2.80112	0.477835	nuclear-transcribed mRNA catabolic process, nonsense-mediated decay
GO:0000786	3.81481	1.66758	3.02448	0.0122887	0.0473057	0.0332652	2.61779	nucleosome
GO:0006334	3.24631	0.849153	2.07309	0.00318323	0.0149067	0.0123033	2.08088	nucleosome assembly
GO:0005634	1.062	0.317133	1.59869	0.224397	0.436009	0.637317	0.336316	nucleus
GO:0048477	2.00742	2.18939	4.23431	0.459325	0.400234	0.632025	1.49626	oogenesis
GO:0016791	1.35156	0.494296	2.00198	0.595501	0.752872	0.544367	0.32388	phosphatase activity
GO:0005886	0.729934	0.841375	1.82216	0.233365	0.60585	0.131372	0.505589	plasma membrane
GO:0045211	0.0397896	0.0550847	0.0303896	2.66998	2.16059	2.53474	0.0119668	postsynaptic membrane
GO:0005267	0.013803	0.0177811	0.0593355	0.737102	1.34914	1.92538	0.125288	potassium channel activity
GO:0006813	0.00231414	0.00337437	0.00848033	1.3849	2.50259	3.38704	0.0389934	potassium ion transport
GO:0048786	1.99773	4.63042	2.52888	1.8657	1.39961	1.83161	2.28307	presynaptic active zone
GO:0006468	0.729654	0.748874	0.878298	2.14446	2.88874	1.37778	0.359286	protein amino acid phosphorylation
GO:0005515	4.28479	1.31641	3.27414	1.01571	1.05872	1.86852	1.97511	protein binding
GO:0006457	0.792344	0.897463	1.44614	0.076972	0.230839	0.516002	0.779774	protein folding
GO:0006464	2.04505	0.927317	1.14439	0.0390233	0.133843	0.0757789	0.493045	protein modification process
GO:0009786	0.35147	0.3755	0.713041	2.47944	1.23458	1.58824	0.431482	regulation of asymmetric cell division
GO:0043058	0.447182	0.473132	0.925493	1.28709	1.60327	3.28403	0.533023	regulation of backward locomotion
GO:0043565	0.00370609	0.0581835	0.00455653	0.497691	1.03112	1.33035	0.00814682	sequence-specific DNA binding
GO:0004252	1.21315	0.568156	2.23101	0.367718	1.39463	1.04354	0.407159	serine-type endopeptidase activity
GO:0000922	3.75225	1.74788	3.00683	0.107553	0.169296	0.103174	3.00335	spindle pole
GO:0003700	0.0248685	0.039972	0.0302844	0.397694	1.06623	1.36319	0.0131086	transcription factor activity
GO:0030528	1.59538	1.04784	1.62161	0.933873	1.19212	1.9585	1.378	transcription regulator activity
GO:0016758	0.275467	4.10399	1.73861	0.198301	0.295043	0.262324	2.69609	transferase activity, transferring hexosyl groups
GO:0046914	2.62286	2.7389	3.00683	0.818581	0.169296	0.36669	3.00335	transition metal ion binding
GO:0006810	0.689007	0.844804	0.641099	0.881398	0.404506	1.57574	0.378483	transport
GO:0006511	0.604131	0.993561	1.5296	0.0940023	0.202831	0.324044	0.663733	ubiquitin-dependent protein catabolic process
GO:0040025	1.99028	1.74265	4.61229	0.64025	0.0648334	0.294368	1.69439	vulval development
GO:0008270	2.31673	0.939011	2.70233	1.87835	3.40715	4.08849	0.359431	zinc ion binding
