# Supplementary material for: Gene Expression Modifications by Temperature-Toxicants Interactions in Caenorhabditis elegans
Source: PLoS One. 2011 Sep 9;6(9):e24676. doi: 10.1371/journal.pone.0024676 (PMC3170376; doi:10.1371/journal.pone.0024676)
Supplement: Table S11 — List of enriched functional domains in regulated genes by toxicants at different temperatures in the full model analysis (from Figure 5 ). Domains associations were extracted from Wormbase release WB195. First column shows the INTERPRO ID number. Next six columns show the −log10 p-value for each treatment. The description of the domain term is also shown. Cells in yellow indicate significant domains (p-value <0.05 or −log10 p-value >1.3, hypergeometric test) (XLS) [file pone.0024676.s015.xls]

## Sheet: Domains full model
Domain ID	CPF	DZN	Temp	CPF*Temp	DZN*Temp	CPF*DZN	CPF*DZN*Temp	Description
IPR003439	1.01558	0.802359	2.01238	0.631526	0.189489	0.102295	0.701531	ABC transporter-like	LEGEND
IPR011989	3.66202	1.41099	5.35209	0.372901	0.154375	0.493075	1.33915	Armadillo-like helical	Significant Domains terms (p-value > 1.3)
IPR004827	0.703322	0.780243	0.626145	0.119	0.123612	0.221581	1.4625	Basic-leucine zipper (bZIP) transcription factor	Not significant
IPR012675	3.19301	1.18668	2.59527	2.89314	1.46597	1.90183	1.3136	Beta-grasp fold, ferredoxin-type
IPR000008	1.21007	1.3341	1.73592	3.13504	1.78328	1.7112	0.410137	C2 calcium-dependent membrane targeting
IPR002018	2.41476	1.03502	4.29576	1.29656	2.53531	2.00652	2.39408	Carboxylesterase, type B
IPR013320	2.47766	3.33138	4.40965	0.0847057	0.207232	0.6996	2.45039	Concanavalin A-like lectin/glucanase, subgroup
IPR003366	1.21007	1.3341	0.657824	0.801925	0.482467	0.532699	1.14373	CUB-like region
IPR008972	6.19634	2.84619	5.40246	1.78396	1.12107	0.895076	4.68097	Cupredoxin
IPR001128	0.748547	2.44672	1.17614	2.01176	2.45539	1.6063	0.519864	Cytochrome P450
IPR002401	0.530647	2.05759	1.24089	2.1286	2.57125	1.70776	0.546392	Cytochrome P450, E-class, group I
IPR002403	0.628387	2.30289	1.13177	1.79523	2.10437	1.4054	0.634603	Cytochrome P450, E-class, group IV
IPR008922	2.47322	2.56288	4.65542	0.255958	0.34273	0.756533	1.55834	Di-copper centre-containing
IPR001650	0.676187	0.325063	1.34924	0.202861	0.15042	0.0636712	1.05016	DNA/RNA helicase, C-terminal
IPR000742	0.989777	0.384751	1.564	0.168032	0.502358	0.970046	0.825972	EGF-like, type 3
IPR001507	0.31378	0.655031	0.282787	2.08066	1.59815	0.928886	0.0563936	Endoglin/CD105 antigen
IPR003961	0.101026	0.294344	0.631323	4.10535	3.17171	2.93414	0.172238	Fibronectin, type III
IPR008957	0.0960951	0.283008	0.60589	2.93512	2.09544	1.96023	0.16547	Fibronectin, type III-like fold
IPR006028	0.0349799	0.0423335	0.0540106	3.26195	2.18697	3.16473	0.0623476	Gamma-aminobutyric acid A receptor
IPR002347	0.998484	1.13655	2.53924	0.334918	0.271352	0.127375	1.47526	Glucose/ribitol dehydrogenase
IPR010987	2.57233	3.3743	2.22279	0.153629	0.412073	0.344698	2.81038	Glutathione S-transferase, C-terminal-like
IPR004045	2.57062	3.41235	1.57946	0.311073	0.640864	0.901217	2.04399	Glutathione S-transferase, N-terminal
IPR017452	0.0104708	0.0225458	2.28953e-05	2.46523	1.87561	1.91267	0.00562543	GPCR, rhodopsin-like superfamily
IPR008144	0.382536	1.09289	0.77332	2.58859	0.674911	3.56762	1.21753	Guanylate kinase
IPR014021	0.729772	0.355171	1.45445	0.237231	0.173672	0.0778876	1.11552	Helicase, superfamily 1 and 2, ATP-binding
IPR009072	1.74251	0.416543	0.612854	0.000158453	3.57663e-05	0.000123119	1.20542	Histone-fold
IPR003599	0.462964	0.823723	0.718595	2.48131	2.83849	2.38203	1.48443	Immunoglobulin subtype
IPR003598	0.421062	0.761337	0.648779	2.66426	3.09392	2.55829	1.39525	Immunoglobulin subtype 2
IPR007110	1.07025	1.59293	1.52897	3.21781	3.39049	3.51695	2.50548	Immunoglobulin-like
IPR013783	1.39076	1.5615	1.49125	3.13968	3.79601	3.01483	2.46521	Immunoglobulin-like fold
IPR001747	1.36908	0.549701	2.02323	Inf	4.34865	Inf	1.55834	Lipid transport protein, N-terminal
IPR002913	2.24918	1.29618	1.80773	3.2713	1.63839	2.15638	0.554232	Lipid-binding START
IPR008253	4.91676	2.33751	5.67049	0.21406	0.295313	0.207961	3.868	Marvel
IPR012340	2.35388	1.96541	3.5466	0.151743	0.0252802	0.140262	3.69901	Nucleic acid-binding, OB-fold
IPR001478	0.828573	0.411485	0.747863	1.90368	0.515868	1.8151	0.574301	PDZ/DHR/GLGF
IPR000169	2.13475	1.72037	1.80478	0.630418	0.471068	0.110166	1.4625	Peptidase, cysteine peptidase active site
IPR006026	0.905269	1.96541	2.40642	0.274875	0.557038	0.256737	0.202401	Peptidase, metallopeptidases
IPR002482	1.52842	1.58729	1.23405	0.91155	2.11851	4.44971	0.681021	Peptidoglycan-binding LysM
IPR011993	2.38362	2.20491	4.33941	2.32646	4.87047	4.0889	2.29322	Pleckstrin homology-type
IPR001849	3.30867	3.05141	3.22627	1.794	3.95235	3.60305	1.58898	Pleckstrin-like
IPR003280	0.0309077	0.0377009	0.134053	1.29656	2.04218	2.45454	0.210796	Potassium channel, two pore-domain
IPR000719	0.876904	1.01245	1.40993	3.29527	3.6553	2.29377	0.578807	Protein kinase, core
IPR010463	0.46791	0.494022	0.960001	2.1913	2.63167	3.22588	1.4254	Protein of unknown function DUF1057, lipase putative
IPR009981	0.522783	0.549701	0.391395	3.76739	1.84954	2.47762	0.611549	Protein of unknown function DUF1505
IPR002542	1.40295	0.678146	1.15916	0.735932	0.612935	0.6996	1.30885	Protein of unknown function DUF19
IPR008166	0.244741	0.505407	0.0777151	1.32563	0.66914	0.763407	0.210488	Protein of unknown function DUF23
IPR003125	0.181561	0.0179531	0.141751	1.57853	1.31947	1.8597	0.0297592	Protein of unknown function WSN
IPR000387	1.59024	0.364852	2.16811	0.972631	0.840504	0.720113	0.332033	Protein-tyrosine phosphatase
IPR016130	1.24707	0.393605	1.59745	1.81018	1.97202	1.73318	0.532699	Protein-tyrosine phosphatase, active site
IPR001936	0.522783	0.549701	0.391395	2.5136	4.34865	1.49979	1.55834	Ras GTPase-activating protein
IPR014729	1.58374	2.3026	0.954227	1.23904	0.264938	0.221581	0.25887	Rossmann-like alpha/beta/alpha sandwich fold
IPR002290	1.0661	1.21204	1.55312	3.95699	4.25916	2.4653	0.705596	Serine/threonine protein kinase
IPR000980	0.272754	0.157639	0.0360549	3.91997	3.39644	1.40135	0.737756	SH2 motif
IPR002198	1.01106	1.16047	2.69632	0.671313	0.367585	0.239297	1.52959	Short-chain dehydrogenase/reductase SDR
IPR011042	2.21974	1.11648	1.96262	0.183861	0.0418799	0.268468	1.02323	Six-bladed beta-propeller, TolB-like
IPR001132	3.19301	2.151	2.59527	1.93571	0.756916	2.84884	3.583	SMAD domain, Dwarfin-type
IPR017855	3.19301	2.151	2.59527	1.93571	0.756916	2.84884	3.583	SMAD domain-like
IPR001452	0.744125	0.84568	1.0218	2.97984	1.31361	2.07152	1.99408	Src homology-3
IPR013026	0.338639	0.658804	0.127252	1.16044	1.97202	1.40014	1.25654	Tetratricopeptide region
IPR011990	0.515881	0.881028	0.475698	1.17108	2.11941	1.65632	1.16148	Tetratricopeptide-like helical
IPR000884	0.123478	0.344672	0.268276	2.44704	2.45531	1.92809	0.202401	Thrombospondin, type I
IPR002227	2.06401	2.151	3.74741	0.180489	0.256492	0.55906	1.3136	Tyrosinase
IPR008266	0.460713	0.334814	0.266147	3.32413	4.05753	2.077	0.132611	Tyrosine protein kinase, active site
IPR002213	0.411258	4.24802	1.90913	0.379879	0.490601	0.483455	3.23534	UDP-glucuronosyl/UDP-glucosyltransferase
IPR015816	1.36908	0.549701	2.02323	Inf	4.34865	Inf	1.55834	Vitellinogen, beta-sheet N-terminal
IPR015818	1.52842	0.617505	2.29659	Inf	3.40786	Inf	1.72119	Vitellinogen, open beta-sheet, subdomain 2
IPR011030	1.36908	0.549701	2.02323	Inf	4.34865	Inf	1.55834	Vitellinogen, superhelical
IPR002035	0.45217	0.515446	1.57946	0.692611	1.61232	2.29701	0.0398762	von Willebrand factor, type A
IPR001846	1.13127	0.447188	1.63102	7.19738	3.4506	7.12106	1.3136	von Willebrand factor, type D
IPR011991	0.37754	0.143207	0.201347	1.51148	1.62072	1.70783	0.105144	Winged helix repressor DNA-binding
IPR013087	0.244741	0.505407	0.6713	2.73986	2.27304	3.05211	0.684131	Zinc finger, C2H2-type/integrase, DNA-binding
IPR001965	1.10893	0.109837	1.57946	0.311073	0.0519215	0.0875057	0.672112	Zinc finger, PHD-type
